# Supplementary material for: LHX2 regulates the neural differentiation of human embryonic stem cells via transcriptional modulation of PAX6 and CER1
Source: PubMed Central journal article supplement — Nucleic Acids Res. 2013 Jun 25;41(16):7753–70. doi: 10.1093/nar/gkt567 (PMC3763550; doi:10.1093/nar/gkt567), 2013-06-25
Supplement: supp_gkt567_nar-03181-x-2012-File010.pdf [file supp_gkt567_nar-03181-x-2012-File010.pdf]

## SUPPLEMENTARY FIGURE LEGENDS

**Figure S1.** Expression of LHX2 in hESC-derived neural cells.

(A-B) Immunocytochemical analysis of differentiating hESCs at IVD day 20 showed that LHX2 is co-expressed with neural progenitor markers Nestin and OTX2. (C-D) Immunocytochemical analysis of differentiating hESCs at IVD day 20 revealed that LHX2 is co-expressed with the neuronal markers Tuj1 and NeuN. (E) Percentage of LHX2 and PAX6 immunopositive cells at IVD day 10, 20 and 30. Error bars represent the mean  $\pm$  s.e.m. (n = 3).

**Figure S2.** Characterization of *iLHX2* and *shLHX2*-expressing hESCs.

(A) RT-PCR analysis of *OCT4*, *SOX2*, and *REX1* gene expression using mRNA isolated from undifferentiated *iGFP* and *iLHX2* hESCs, and *shLuc* and *shLHX2*-expressing hESCs. (B) AP staining and OCT4 and SSEA4 immunofluorescence analysis of undifferentiated *iGFP*, *iLHX2*, *shLuc* and *shLHX2* cells show that the transgenic hESCs expressed alkaline phosphatase, OCT4 and SSEA4.

**Figure S3.** Ectopic expression of *LHX2* in differentiating NTU1 hESCs and iCFB46 iPSCs.

qRT-PCR analysis of the indicated genes using mRNA isolated from NTU1 hESCs and CFB46 iPSCs infected with lentivirus encoding *LHX2* or *GFP*. Error bars represent the mean  $\pm$  s.e.m. (n = 3).

**Figure S4.** LHX2 does not regulate PAX6 expression through its promoters.

(A-B) Sequence analysis of *PAX6* promoters P0 (bp -818 to -411) and P1 (bp +7671 to +8083). Incomplete LHX2 binding motifs (TAATTA) are indicated in boldface. The PCR product "0" containing incomplete LHX2 binding sites is underlined. The PCR product "1" (acting as a negative control) is double underlined. (C) Combined ChIP and qPCR analyses of DNA isolated from hESC-NPs using an antibody against LHX2 revealed that LHX2 does not bind to

the *PAX6* promoters P0 and P1. DNA from undifferentiated hESCs served as a negative control. Error bars represent the mean  $\pm$  s.e.m. (n = 3).

**Figure S5.** Expression of *CER1* during neural differentiation of hESCs.

(A) RT-PCR and qRT-PCR analysis of *LHX2* and *CER1* mRNA isolated from differentiating hESCs on the indicated days. Error bars represent the mean  $\pm$  s.e.m. (n = 3). (B) Immunocytochemical analysis of differentiating hESCs at IVD days 10 and 20 with antibodies against LHX2 and CER1, demonstrating that CER1 is co-expressed with LHX2 in neural progenitor cells. (C) qRT-PCR analysis of *CER1* using mRNA isolated from *iLHX2* hESCs with transiently expressing *shLuc* or *shPAX6* through lentiviral infection. *dox<sup>i</sup>LHX2* hESCs were used as a control. *ACTIN* was used as the internal control for normalization (n = 3). Error bars represent the mean  $\pm$  s.e.m. Significance: \**P* < 0.05.

**Figure S6.** The effects of CER1 on neural and mesodermal differentiation.

(A) qRT-PCR analysis of indicated genes using mRNA isolated from differentiating *shCER1*-expressing hESCs at IVD day 12. *ACTIN* was used as the internal control for normalization (n = 3). Error bars represent the mean  $\pm$  s.e.m. Significance: \**P* < 0.05. (B) Western blot analysis of protein isolated from *shLuc*- or *shLHX2*-expressing hESCs transiently expressing *CER1* through lentiviral infection, using antibodies against ACTB and proteins downstream of the BMP4 (phosphor-SMAD1 and SMAD1) and WNT (phosphor- $\beta$ -catenin and  $\beta$ -catenin) signaling pathways. Proteins isolated from hESCs expressing GFP were used as a control. Signals were determined by Image J software with consistent index and all values were normalized to *shLuc* cells with GFP expression.

**Figure S7.** Identification of LHX2 binding target on CER1.

(A) Combined CHIP and qPCR analysis of DNA isolated from hESC-NPs using antibodies against LHX2. DNA from undifferentiated hESCs served as a negative control. LHX2 does not bind to the *CER1* promoter. (B) VISTA Browser display of a 47 kb fragment of the *CER1* region on Chr. 9 of the human genome (chr9: 14,681,866-14,728,766). VISTA plots are shown in the six-way (Human-Rhesus-Dog-Horse-Mouse-Rat-Chicken) alignment. Based on the annotation, conserved regions above 70%/ 100bp in VISTA are above the cutoff, and are colored under the curve (red: conserved noncoding regions; blue: conserved exons; turquoise: untranslated regions). Lines under the VISTA plot show screened conserved regions among species (black: regions I and III without putative LHX2 binding sites; gray: regions II and VI with putative LHX2 binding sites but without LHX2 binding signals; red: regions IV, V, VII, VIII and IX with LHX2 binding signals; blue: predicted promoter region). Error bars represent the mean  $\pm$  s.e.m. (n = 3).

**Figure S8.** Forebrain gene expression in hESC-derived neural progenitors and the effect of LHX2 in forebrain lineage differentiation.

(A) qRT-PCR analysis of indicated genes using mRNA isolated from undifferentiated and differentiating H9 hESCs at IVD day 12. *ACTIN* was used as the internal control for normalization. Error bars represent the mean  $\pm$  s.e.m. (n = 3). Significance: \* $P < 0.05$ . (B) Transcriptome profiling of hESCs with altered *LHX2* expression, with regard to regional patterning. The bar chart shows the number of region-specific genes with greater than 1.3 fold expression changes, as determined using Genespring software.

Figure S1

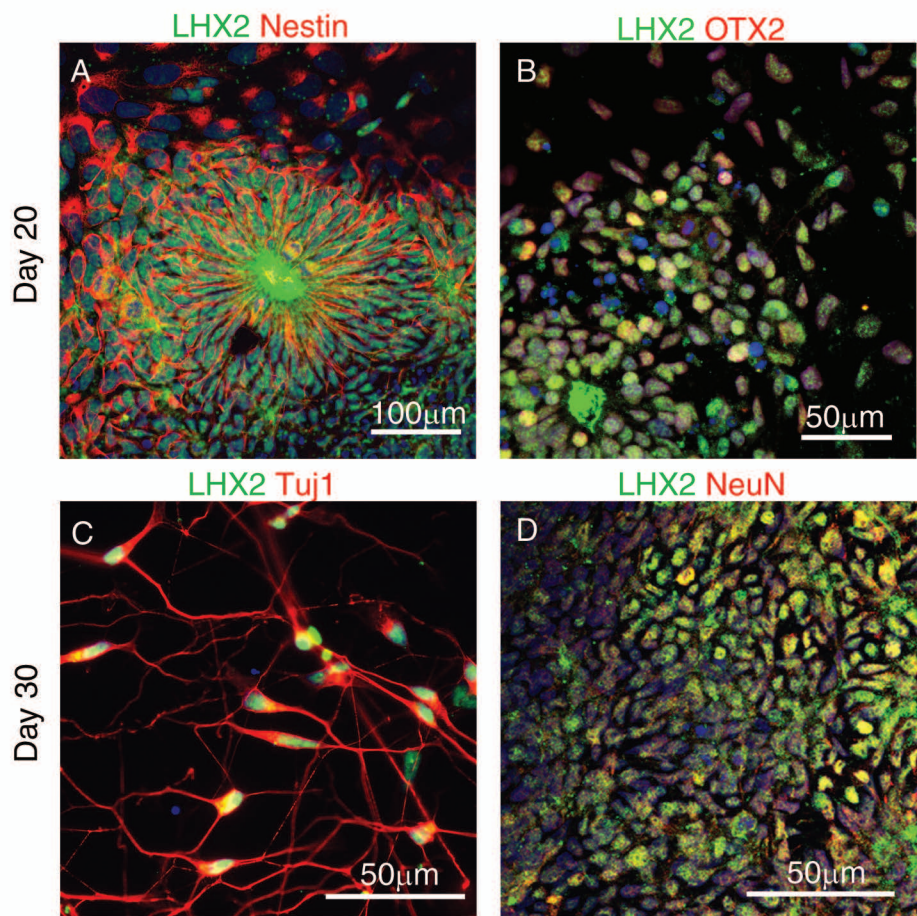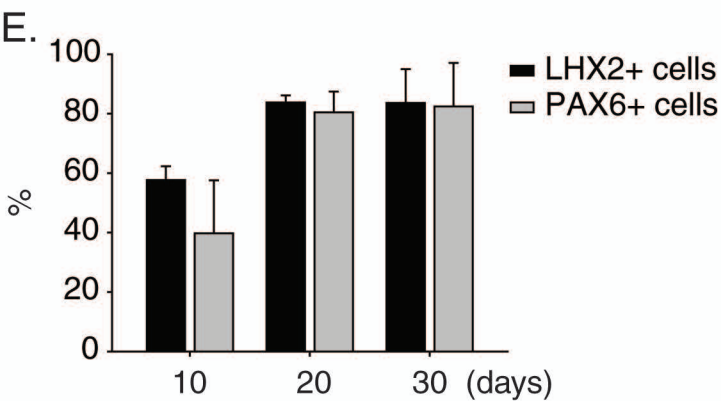

Figure S2

A

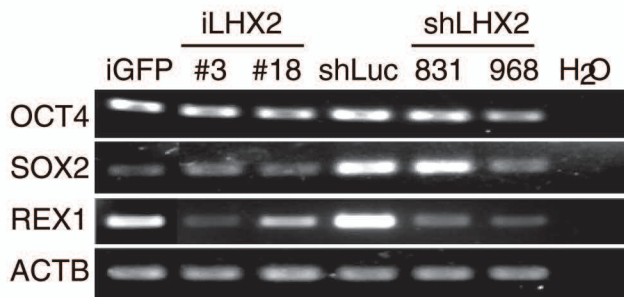

B

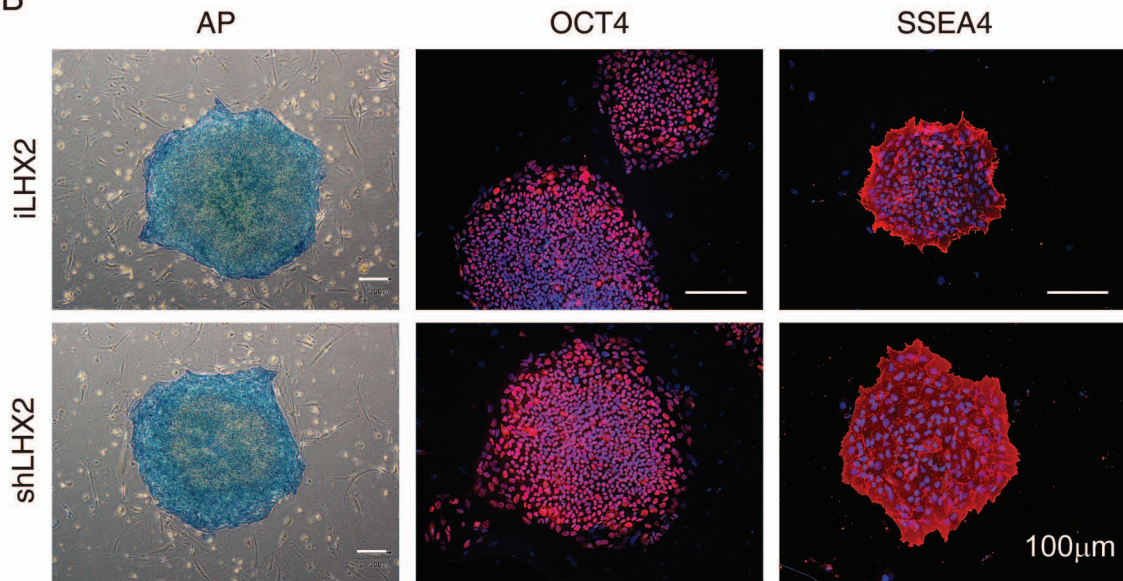

Figure S3

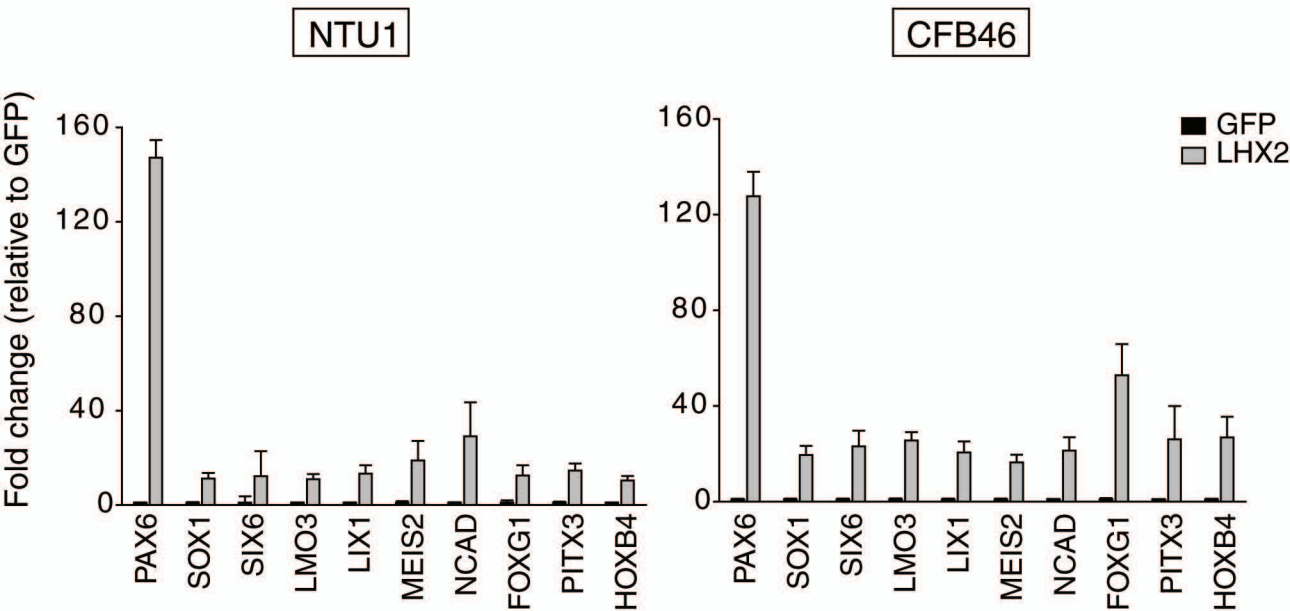

# Figure S4

## A. P0 promoter

-818 AGACCAGCAA GTCAGTGTCC TGCAGACCCC GCCCCAATTT CTATGAGTAT TGA~~CTTC~~AGATA ATCTGGGATT  
 TTCTGTTTT CCTCCTCTAA GTCACAAAGT CAACAGTTAA **TT**C~~AAAGT~~CA AAGATAAATA CAATCACCTA  
CATTTCTAA TGTGGTTGGA GCCTTTTCAGC CAGAGGGCGA GGAAGCCCG GGTAGGCCCC CTTTAGGGCT  
 TCCCTCTTGA GAACCCAGCA GGCCTGGAGA GACCTTTGGC CTAGGCCCTG AAAAAAGGGT CGCATGTCTT  
CTCCCCGAG CCCCCGTCTG TGCCCGAGTA GTGACTTGCG GGCTCGAGGG CCAGGTTGAG GGTACTCATC  
 GAGCCTCGAA CTCCTCCTAA AAATGATTCC TGCCAAAAGC GCCTCTCCAT CCCGCGC

## B. P1 promoter

+7671 CCGCGCCGAA TCTCGGCGTG CGCGGAGCGG GGAGATGCAG GCGAGCGCCA GAGCCCGGGC TCGGGGGCCC  
 TGCGCCGGGG AGAGGAGCCG GGACCCACCG GCGGAGCCGA AAACAAGTGT ATTCATATTC AAACAAACGG  
ACC**AATT**GCA CCAGGCGGGG AGAGGGAGCA TCCAATCGGC TGCGCGGAGG CCCC GGCGCT GCTTTGCATA  
 AAGCAATATT TTGTGTGAGA GCGAGCGGTG CATTTGCATG TTGCGGAGTG ATTAGTGGGT TTGAAAAGGG  
AACCGTGGCT CGGCCTCATT TCCCCTCTG GTTCAGGCGC AGGAGGAAGT GTTTTGCTGG AGGATGATGA  
 CAGAGGTCAG GCTTCGCTAA TGGGCCAGTG AGGAGCGGTG GAGGCGAGGC CGGGCGCCGG CA

## C.

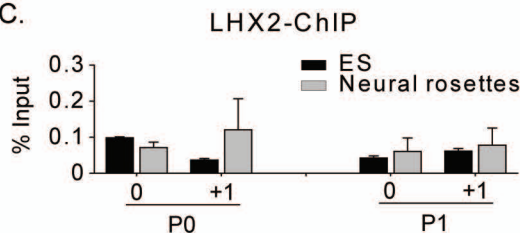

# Figure S5

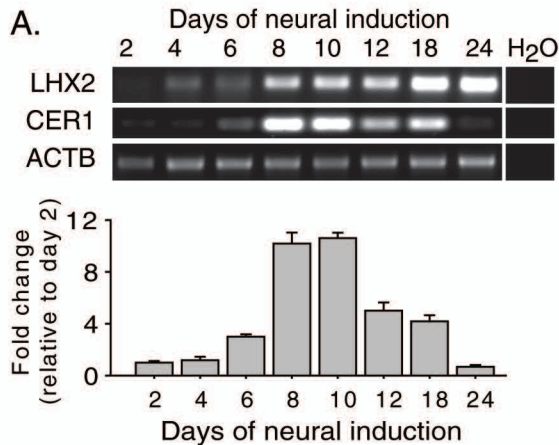

**B.** LHX2 CER1  
Day 10

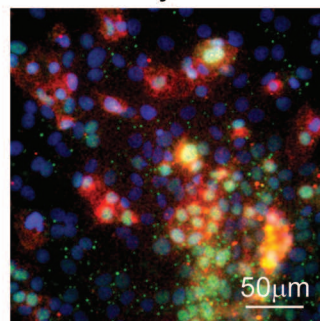

Day 20

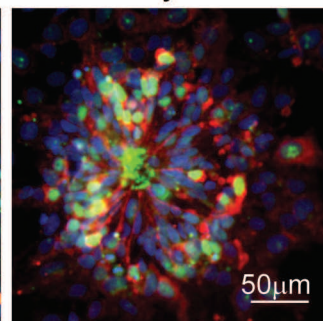

**C.** CER1

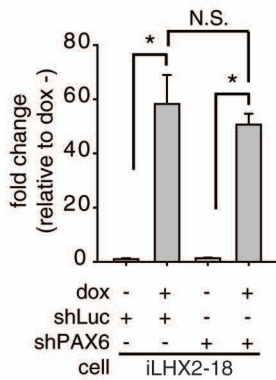



Figure S6

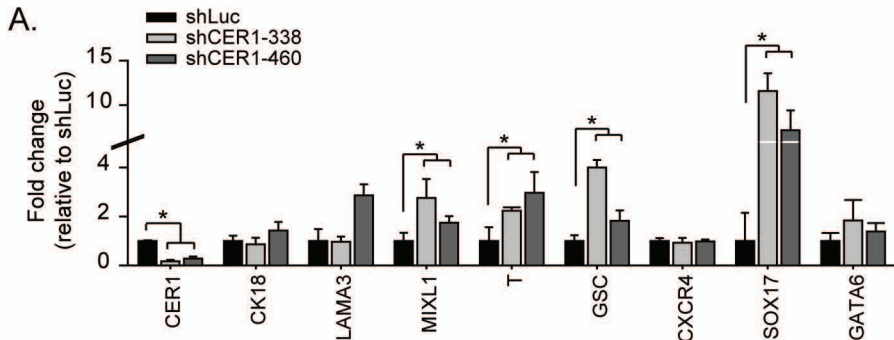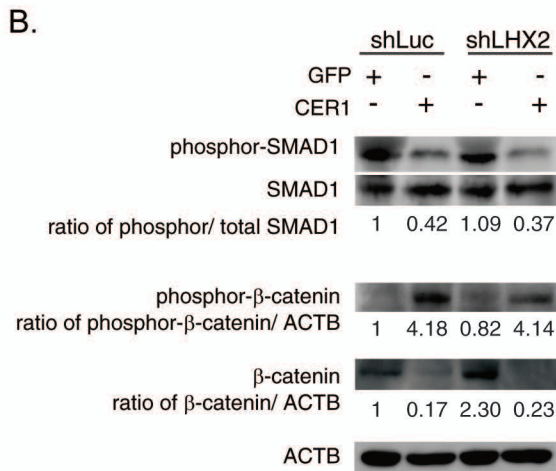

Figure S7

A.

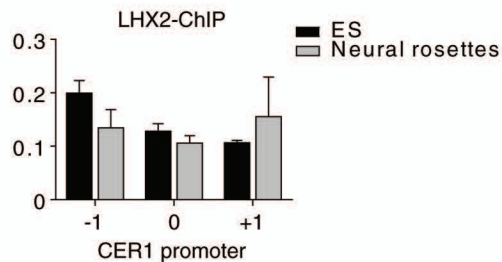

B.

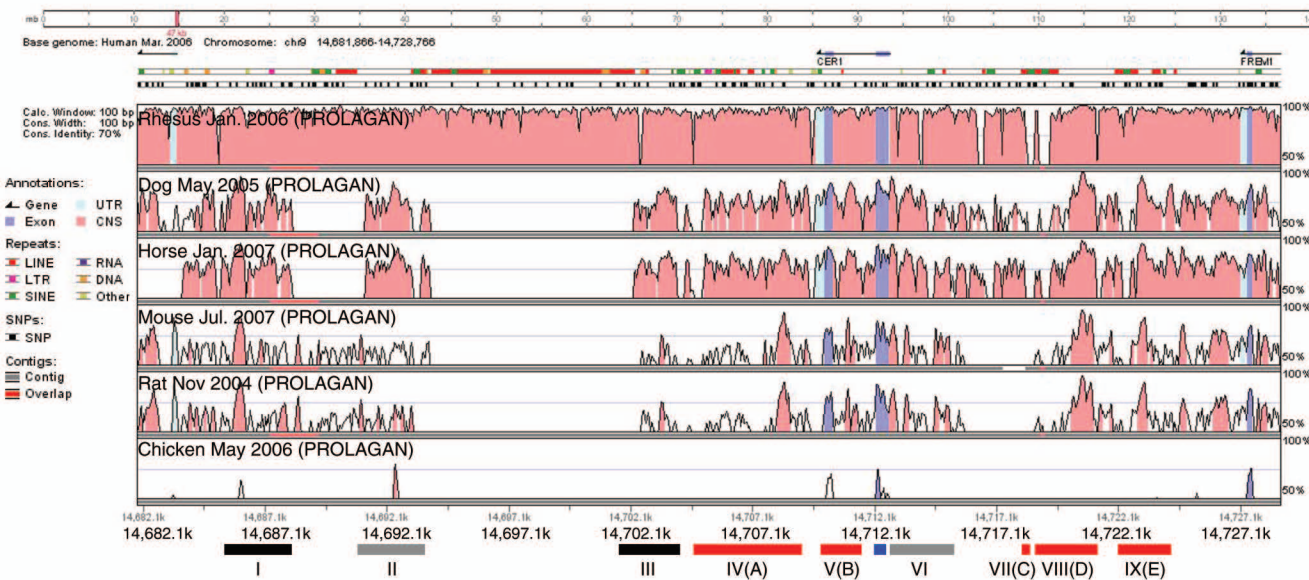

# Figure S8

A.

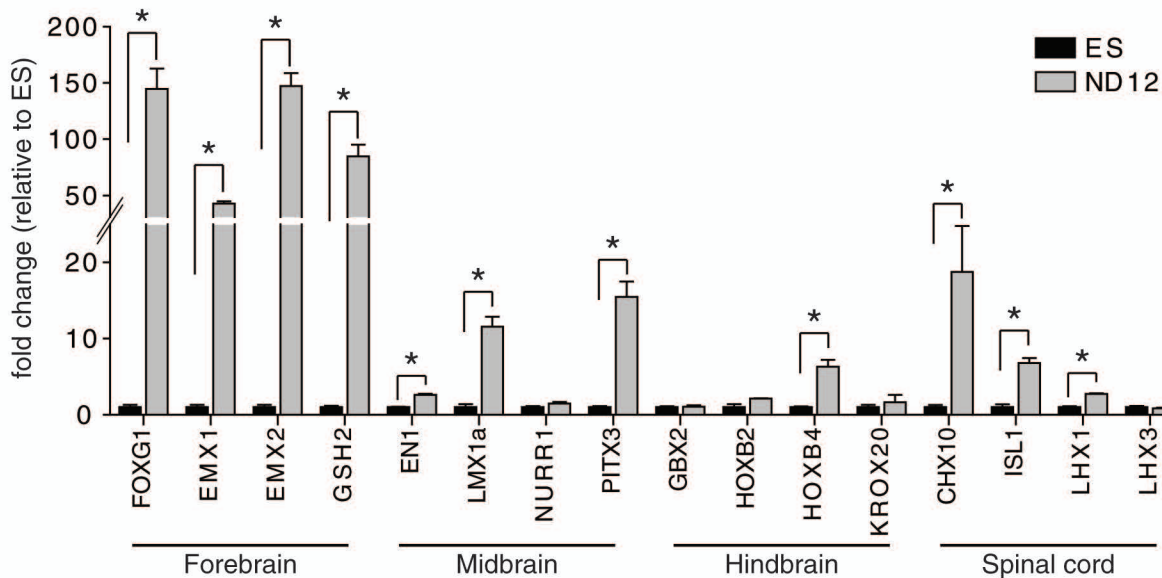

B. shLuc v.s. shLHX2

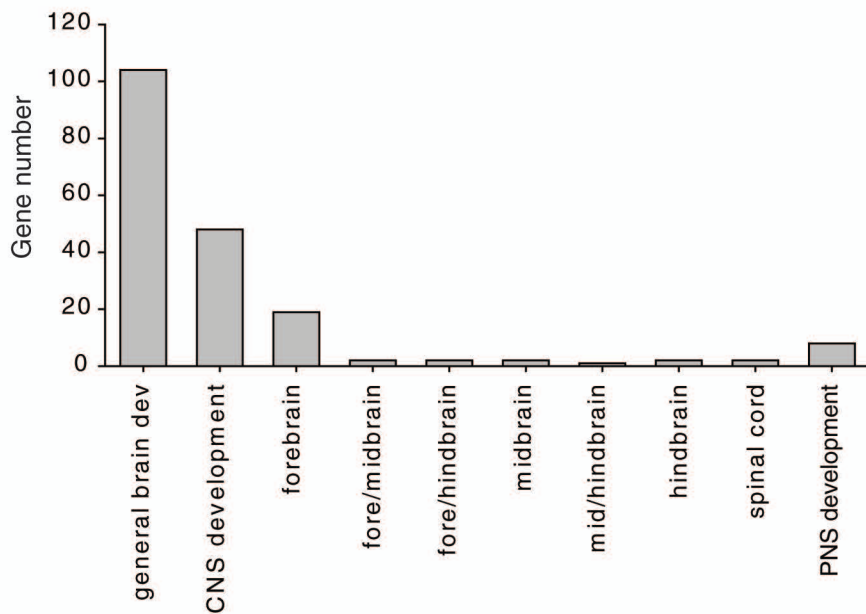

**Table S1. Primers for RT-PCR, qRT-PCR and q-ChIP**

| RT-PCR  | NAME   | Forward                   | Reverse                   |
|---------|--------|---------------------------|---------------------------|
|         | OCT4   | CTTGCTGCAGAAGTGGGTGGAGGAA | CTGCAGTGTGGGTTTCGGGCA     |
|         | NESTIN | GCCACCTCACTGCAGTAGTG      | AGTCAGCACATGGGAGTGC       |
|         | LHX2   | GAAGGGCGGCCGAGGAAAC       | GCTGGTCACGGTCCAGGTGC      |
|         | PAX6   | AACAGACACAGCCCTCACAAACA   | CGGGAACCTGAACTGGAAGTGC    |
|         | SOX1   | CAATGCGGGGAGGAGAAGTC      | CTCTGGACCAAAGTGTGGCG      |
|         | LMO3   | TGTGCCTGCTGTGACTGTTCGC    | CAGGACGCGCAGTTTCCCGT      |
|         | LIX1   | GGAATTTTGGGAAAGCAAGC      | CAGCACTGAAAGTTGCCAAA      |
|         | RAX    | AGCGCGCGTTCGAGAAGTCC      | GTTGACCTTGCCGGCCAGCT      |
|         | OTX2   | CGCCTTACGCAGTCAATGGG      | CGGGAAGCTGGTGATGCATAG     |
|         | NCAD   | TGGCTCTACTGCTGGGTCCCT     | TGGCCCCCAGTCGTTCCAGGT     |
|         | MEIS2  | CCAGGGGACTACGTTTCTCA      | TAACATTGTGGGGCTCTGTG      |
|         | MAP2   | GCATGAGCTCTTGGCAGG        | CCAATTGAACCCATGTAAAGCC    |
|         | GFAP   | AGGGCTGACACGTCCAC3        | GCCTTAGAGGGGAGAGGAG       |
|         | GAPDH  | ACCACAGTCCATGCCATCAC      | TCCACCACCCTGTTGCTGTA      |
| qRT-PCR | OCT4   | CCGAAAGAGAAAGCGAACCAG     | AGAACCACACTCGGACCACATC    |
|         | NANOG  | CAGCAGATGCAAGAAGTCTCCA    | CATTGCTATTCTTCGGCCAGT     |
|         | PAX6   | GATAACATACCAAGCGTGTCAATA  | TGCGCCCATCTGTTGCT         |
|         | SOX1   | TCCTGGAGTATGGACTGTCCG     | GAATGCAGGCTGAATTCGG       |
|         | SIX6   | AACAAGAATGAGTCCGTGCT      | CAGCGGAACTTCTTCTTA        |
|         | LMO3   | ACGGAGCGCCGAGATGATG       | GGCACAGGATGAGGTTGGCC      |
|         | LIX1   | GGAATTTTGGGAAAGCAAGC      | CAGCACTGAAAGTTGCCAAA      |
|         | MEIS2  | CCAGGGGACTACGTTTCTCA      | TAACATTGTGGGGCTCTGTG      |
|         | NCAD   | TCCTGATATATGCCAAGACAA     | TGACCCAGTCTCTCTTCTGC      |
|         | FOXG1  | AGAAGAACGGCAAGTACGAGA     | TGTTGAGGGACAGATTGTGGC     |
|         | EMX1   | GAGACGCAGGTGAAGGTGT       | GTTGATGTGATGGGAGCCCT      |
|         | EMX2   | CACAGAAACGGACAACATGG      | CTTTAGACGAGGGTCGCTTG      |
|         | GSH2   | CTCGTCTATCATCAAGGACA      | AGTGCAGGTGCGAAGTGAC       |
|         | PITX3  | TGGACTAGGCCCTACACACAGA    | GCGCACGTTTATTTTATTTATCTTT |
|         | EN1    | ACCGCACCACCAACTTTTTTC     | TCCTTTTTGCAGCCGAAGTC      |
|         | NURR1  | TTCTCCTTTAAGCAATCGCCC     | AAGCCTTTGCAGCCCTCACAG     |
|         | LMX1a  | ACATGAGCAGGGCTGAGACT      | TGGTGTCTCCTTACAGCACAG     |
|         | HOXB4  | AAAGAGCCCGTCTCTACC        | GTGTAGGCGGTCCGAGAG        |
|         | GBX2   | CTCGTCTCTCGCCTTCTC        | GCCAGTCAGATTGTTCATCCG     |
|         | HOXB2  | TTTAGCCGTTTCGCTTAGAGG     | CGGATAGCTGGAGACAGGAG      |
|         | KROX20 | TTGACCAGATGAACGGAGTG      | CAGAGACGGGAGCAAAGC        |
|         | ISL1   | ATGACAAAATAATATCCAGGGG    | ATTGACCAGTTGCTGAAAAGC     |
|         | CHX10  | CCCATCAGTGGAGTCCAGAT      | TGTGAGGCATAGGACATGGA      |
|         | LHX1   | TAAATGTAAAGCCCTCCGTATCA   | CCATCTTACCGAGTGTGTC       |
|         | LHX3   | GCTGGGCCCCGGGAAAGTTCG     | GTGCTAGCAGCAGGTTCGCTC     |
|         | βACTIN | GAGCACAGAGCCTCGCCTTT      | ACATGCCGGAGCCGTTGTC       |
|         | CK18   | TGGCAGACATCCGGGCCCAA      | TGTGGTGTCTCTCTCAATCTGCT   |
|         | LAMA3  | CCTGGGGCAGTGTCTGGGCTA     | GCTACAACCCTGGCTGGGTCTAA   |
|         | MIXL1  | AACGAAATGTCTGAAGCCCCA     | TCCTCCCATGAGTCCAGCTTT     |
|         | T      | GGCATCGGAGGCGCGAGAAC      | CGGACCAAGACTGTCCCCGCT     |
|         | GSC    | CGGAGAAGTGAACAAGACGT      | GCGTGTGCAAGAAAGTAGCATC    |
|         | CXCR4  | GGATCAGCATCGACTCCTTCA     | TTCTCAAACCTCACACCCTTGCTT  |
|         | SOX17  | GCCAAGGGCGAGTCCCCTATC     | CGACTTGCCAGCATCTTGCTCA    |
|         | GATA6  | GGCGCTCCTCTCTCTTTTTTATTC  | TCTAGCTCCTCGGGCGGGC       |
| q-ChIP  | P0-0   | CTAAGTCACAAAGTCAACAGT     | GCTGAAAGGCTCCAACCA        |

|  |            |                                  |                                |
|--|------------|----------------------------------|--------------------------------|
|  | P0-1       | CCTGGAGAGACCTTTGG                | GAGCCCGCAAGTCACTA              |
|  | P1-0       | TGTATTCATATTCAAACAAACGGAC        | CGATTGGATGCTCCCTC              |
|  | P1-1       | ATGTTGCGGAGTGATTAGT              | ACCAGAGCGGGAAATGA              |
|  | E6-1       | AGATCCTGCTACGTCTGTC              | GATGGTTCAAGGCACCG              |
|  | E6-0       | GGTGCCTTGAACCATCTT               | CGCAACTACCGCCTCTA              |
|  | E6+1       | GTCCCTCCCTCACCCCA                | TCGGTGGAGCCTCAGGG              |
|  | ETel-A-2   | AGTTACTGAGGGAGGGATAG             | CAGAAGAGCACACTCGG              |
|  | ETel-A-1   | ATCGCAGTTCACGACAT                | GCGGCAGGGTGTCTTTA              |
|  | ETel-A-0   | CTCCCAGCGTGTGATTT                | TCAGTGAGAATCGCTAATTATTAGG      |
|  | ETel-A+1   | GAAGTGTCCCCTTAGTGAG              | GCTGAACCACAAGTTAGTCT           |
|  | ETel-A+2   | TCATAAATCAAACCCAGCCAT            | ACGATCTCCAATAAACATCTCTAAT      |
|  | ETel-B-0   | GGTGACATAATTACCTCTGACCA          | GAGAAGGCGACAGAGGA              |
|  | ETel-B+1   | CCGTGATAGGCTTGTCTTT              | ATCTGAATAGTAATTCAGTCATCC       |
|  | ETel-B+2   | TGGGTGGTGTCTTTGTTG               | TGCCTCTGATTCTCAGC              |
|  | +156kA-1   | ATAACCTTCCTTCCCAAAGTC            | GAAGATCTGAATTTAATCCTGGC        |
|  | +156kA0    | TAACATGTTCAAACTCTGTTAATTA        | AATGCCTTTAAGCACTTGCAG          |
|  | +156kA1    | ACTGGCAGAAATGACACT               | GTTAGGAGCACAGGCTTT             |
|  | +156kA2    | AACTATCTGCCATGCCC                | CTTCAGGACACAGGCTTT             |
|  | +156kB-2   | GGAGGATTTAATAGTAAGGGTAGTT        | TTTGTCTGTTGCTCACTTGG           |
|  | +156kB-1   | CCTTTGGAATTAGGAAATATCAACA        | CAGGGCATTAGTAAGTCTTTTAATC      |
|  | +156kB0    | AAGGTTCTTATGTAGACTTAATTA         | TTTTCTTAGGTAGCCACTTTTTC        |
|  | +156kB1    | TACTTAGGAGGCTGAGGCA              | GCAATCTCGGCTCACTG              |
|  | +156kB2    | CCTGTAATCCCAGCACTTT              | CGTCTCGATCTCCTGAC              |
|  | +156kC-2   | AAATTGCTCCCATTTTTCCC             | GCAGTGTTATATGAATTTCTTCTGAT     |
|  | +156kC-1   | AATAGAGATTATCCAAAACAGTAGT        | AAGTTTAAAACAAATTCTGCTTTCC      |
|  | +156kC0    | TGATGTTTTGTATAATATTTAAATAATTATGC | CATGCTTAAGCATATACGTATATTA      |
|  | +156kC1    | CACCATCACATGAGGCAAA              | TGTCACAGGAGCAGTGTAATA          |
|  | +156kD0    | GGAGGATTTAATAGTAAGGGTAGTT        | CCCTTGTCTCTTGGGGAA             |
|  | +156kD1    | GCCTCCTGAGTAGCTGAA               | ATCTAAAGCAAAGAAGAGAATCACA      |
|  | +156kD2    | GTGTGTGTAAGAACCCTGTAGA           | AAACAGCTTCATCCTAGGTC           |
|  | CER1-pro-1 | CTGGGCTTTTTCTAAATGTATGC          | GCCTTGTGCTGGAATAGAAT           |
|  | CER1-pro-0 | GTTGTCTTTGCTAATACTGCTC           | CAGTGAAAGCCTGGGAC              |
|  | CER1-pro+1 | CAAAGTGACGGCAGGAG                | GTCAGTAGCCAGGCAGA              |
|  | CER1-A-2   | AATGATGTATAGAAAGTGTTTGGC         | CAATAGGTATCATCTACTGAGGTTA      |
|  | CER1-A-1   | TACAATCCTGAAAGAAACCTCC           | GCCATCATTAATTAATTTATAAGGTCCA   |
|  | CER1-A0    | ATAAAGATATAATTACAAGCTGATATGAGT   | GACAAGTTTGGGTTCCAGC            |
|  | CER1-A1    | ATCCTCTACTCATTTATTCATATTCCTTG    | GTCTATGATGAGCCTGGTC            |
|  | CER1-A2    | CACCTCTAGGAGATAACAAATATAAAGC     | GACTACTAATTATTGAGTTCTTACTATGTG |
|  | CER1-B-2   | AGCAAACACATTTCCATTACG            | TCCTCAGATTTACAGTCCATAGC        |
|  | CER1-B-1   | TGTCTAATTGGATGTGAGCG             | TATGTATTGGGAGCCTACTATGC        |
|  | CER1-B0    | ACCTTTACCTCTCATAACTCCA           | TTTGAAATTTCTTTTGAATTCTATTGC    |
|  | CER1-B1    | TATCTTCATGTTTAAGGACCTAATGC       | CATCCTACTGTCTACTTCTCT          |
|  | CER1-B2    | CTATTAAGAAGTCCCTCATAAACCTA       | CCAAATACTCTCATATCCATTTACGA     |
|  | CER1-C0    | GCCTTTACATAGTAAATGCC             | GAATTAAGTGGGATAGGGAAGAA        |
|  | CER1-C1    | GCACTTTGGGAGACCGA                | TAGAGACAGGGTTTCACCAT           |
|  | CER1-D0    | TGTCTCAACGGAACCCT                | AGGCAGAGCAGTCAAAG              |
|  | CER1-D1    | AGAACCATCAGATAAGTGAG             | AGTGTGGAAGGAGAAACGAA           |
|  | CER1-D2    | CTCCATGTCACTGAGATGTATTT          | CGAGGAATCACCGAATAGC            |
|  | CER1-E-2   | AAGTTATATGTGTAAGTTATGAGGATAGTA   | GCCTTTAGAACAGGATCGT            |
|  | CER1-E-1   | TATAACTCCAGAATATTTCCATCATCTC     | TGGGACTAAGTCCAATAGGTA          |
|  | CER1-E0    | CTGCTCAGAATGCTAATAGATATG         | GAGAAAGTTACTGTGTGAAGAAAT       |

|  |         |                     |                       |
|--|---------|---------------------|-----------------------|
|  | CER1-E1 | CTCATCTCTCTCTCCCGTA | CCTCTGCCTTGATTGATAGTT |
|--|---------|---------------------|-----------------------|

**Table SII. Region position**

| Name         | Position (UCSC genome browser: Human Feb. 2009 GRCh37/hg19) |
|--------------|-------------------------------------------------------------|
| PAX6 related |                                                             |
| P0           | chr11:31,839,282-31,840,731                                 |
| P1           | chr11:31,832,704-31,834,156                                 |
| -6k          | chr11:31,847,523-31,848,122                                 |
| Etel         | chr11:31,837,445-31,839,211                                 |
| +156k        | chr11:31,679,369-31,690,371                                 |
| CER1 related |                                                             |
| promoter     | chr9:14,722,713-14,723,559                                  |
| A            | chr9:14,715,743-14,716,426                                  |
| B            | chr9:14,720,391-14,721,701                                  |
| C            | chr9:14,728,766-14,729,088                                  |
| D            | chr9:14,729,390-14,729,961                                  |
| E            | chr9:14,733,116-14,735,245                                  |
